# Supplementary material for: Genetic polymorphisms of 17 Y-chromosomal STRs in the Chengdu Han population of China
Source: Springer Nature journal article supplement (doi:10.1007/s00414-016-1511-4), 2016-12-11
Supplement: MOESM1 [file 11918936]

I


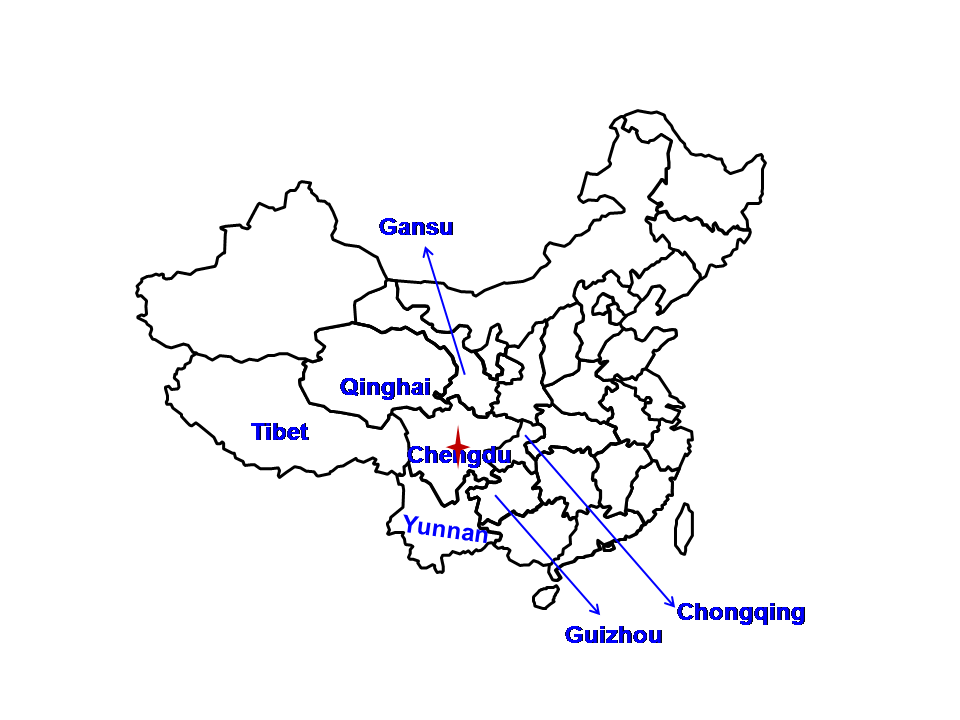


**Figure S1** The location of Chengdu and six surrounding Chengdu provinces in China map

The red mark represented location of Chengdu; other 6 provinces around Chengdu represented the locations of 13 reference populations.
