# Supplementary material for: Genetic polymorphisms of 17 Y-chromosomal STRs in the Chengdu Han population of China
Source: Springer Nature journal article supplement (doi:10.1007/s00414-016-1511-4), 2016-12-11
Supplement: MOESM2 [file 11918936]

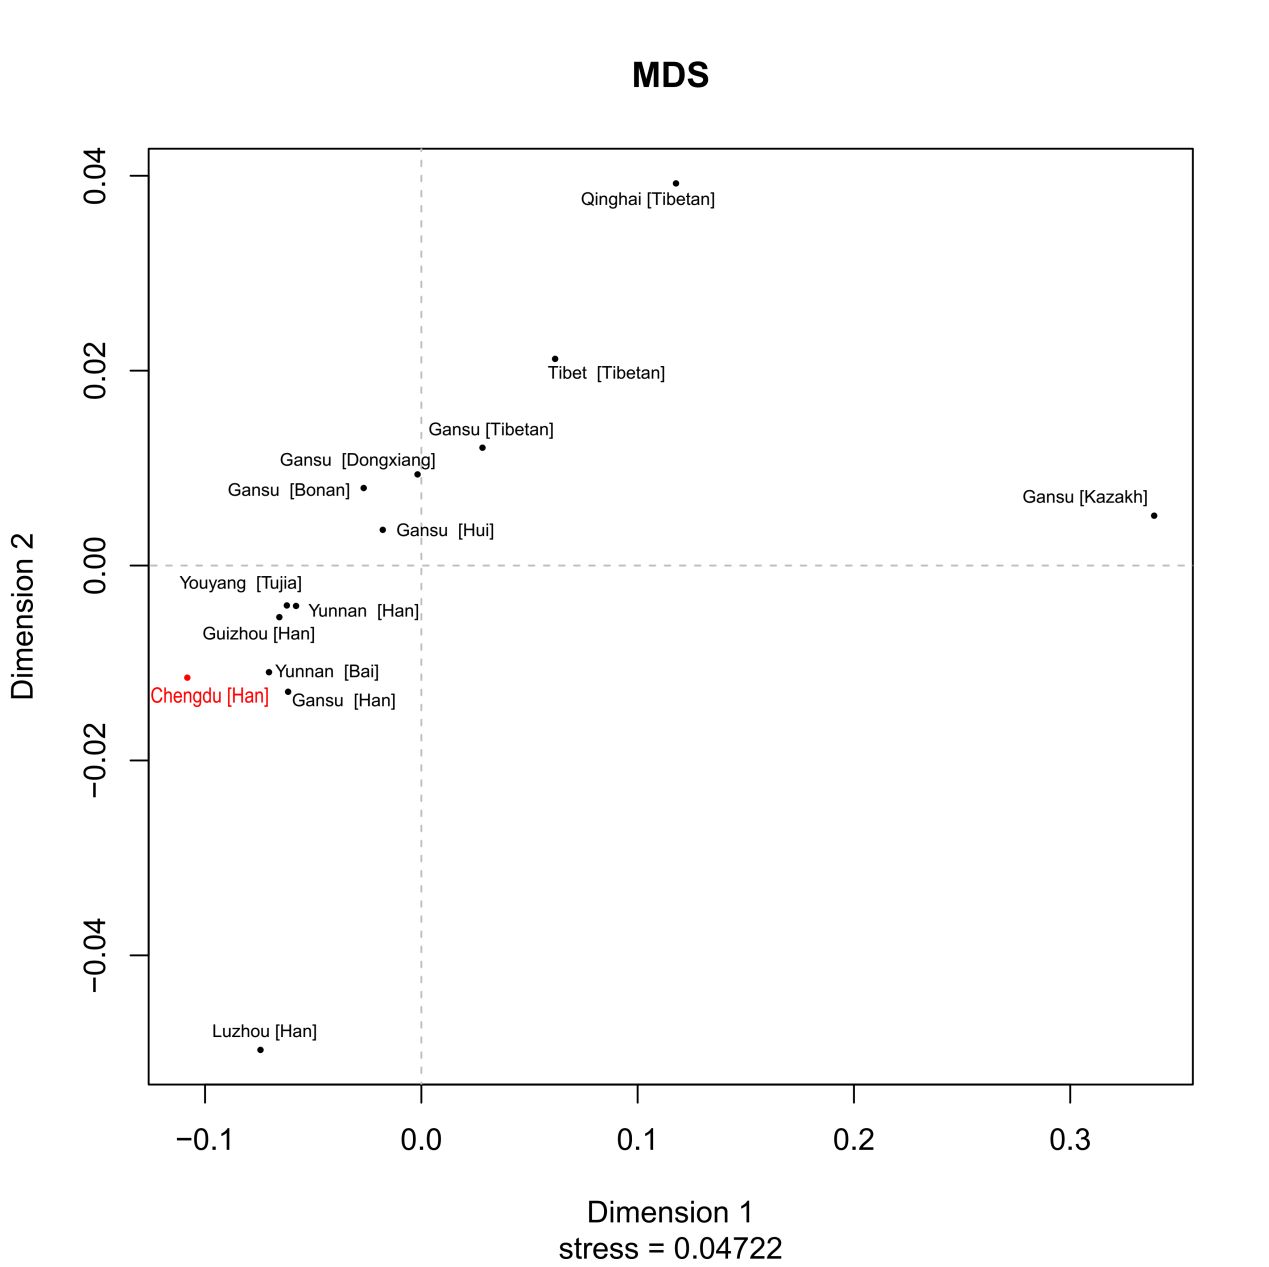


**Figure S2**

Multidimensional scaling (MDS) plot based on Rst values between Chengdu Han and 13 reference populations.

Red color represented the studied Chengdu Han population.
